# Supplementary material for: Stathmin and phospho-stathmin protein signature is associated with survival outcomes of breast cancer patients
Source: PubMed Central journal article supplement (PMC4673159; doi:10.18632/oncotarget.4276), 2015-06-13
Supplement: oncotarget-06-22227-s001.pdf [file oncotarget-06-22227-s001.pdf]

## SUPPLEMENTARY FIGURE AND TABLES

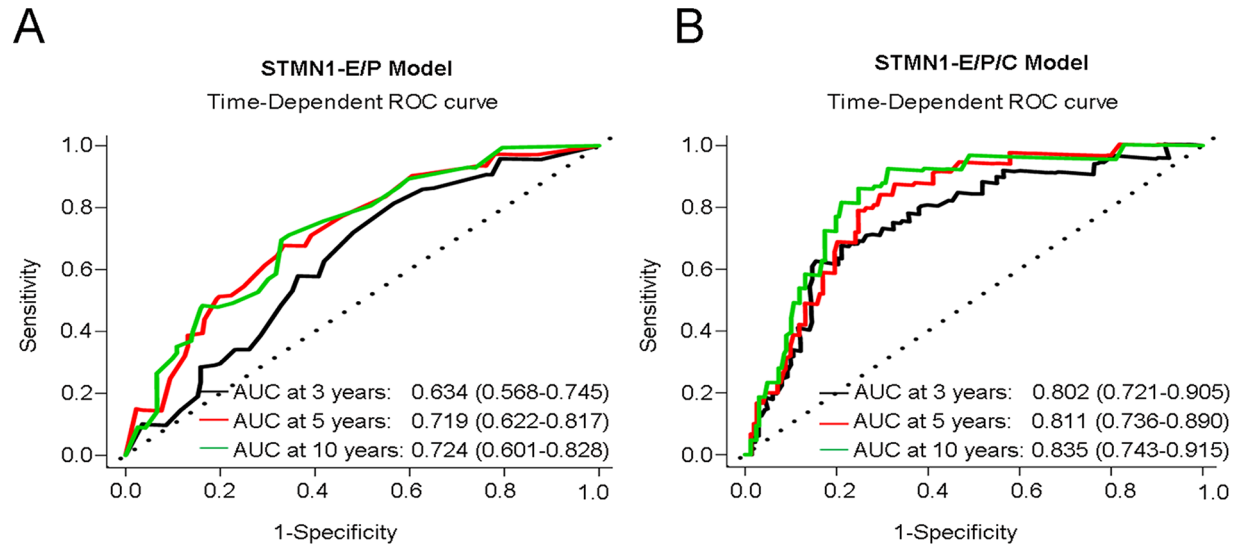

**Supplementary Figure S1: Time-dependent ROC curves for patients in the training set.** We used AUCs at 3, 5 and 10 years according to the STMN1-E/P and STMN1-E/P/C models, respectively, to assess prognostic accuracy and calculated *P* values using the log-rank test.

**Supplementary Table S1: Clinicopathological characteristics and the expression of STMN1, Ser16, Ser25, Ser38 and Ser63 in both training cohort and validation cohort**

**Supplementary Table S2: Clinicopathological characteristics and the risk score derived by the STMN1-E/P model in both training set and validation set**

| Characteristics    | Training set (n = 204) |            |                       | Validation set (n = 106) |            |                       |
|--------------------|------------------------|------------|-----------------------|--------------------------|------------|-----------------------|
|                    | Low risk               | High risk  | <i>P</i> <sup>a</sup> | Low risk                 | High risk  | <i>P</i> <sup>a</sup> |
| Age                |                        |            | 0.888                 |                          |            | 0.050                 |
| <50 y              | 42 (20.6%)             | 49 (24.0%) |                       | 18 (17.1%)               | 34 (10.0%) |                       |
| ≥50 y              | 54 (26.5%)             | 59 (28.9%) |                       | 29 (27.6%)               | 24 (22.9%) |                       |
| NA                 | 0 (0.0%)               |            |                       | 1 (0.9%)                 |            |                       |
| Menopausal status  |                        |            | 1.000                 |                          |            | 0.694                 |
| Premenopausal      | 40 (19.6%)             | 44 (21.6%) |                       | 19 (17.9%)               | 27 (25.5%) |                       |
| Postmenopausal     | 56 (27.5%)             | 64 (31.4%) |                       | 28 (26.3%)               | 32 (30.2%) |                       |
| Tumor stage        |                        |            | 0.631                 |                          |            | 0.181                 |
| I                  | 26 (12.8%)             | 33 (16.3%) |                       | 14 (13.3%)               | 18 (17.1%) |                       |
| II                 | 54 (26.6%)             | 53 (26.1%) |                       | 25 (23.8%)               | 22 (21.0%) |                       |
| III                | 16 (7.9%)              | 21 (10.3%) |                       | 8 (7.6%)                 | 18 (17.1%) |                       |
| NA                 | 1 (0.5%)               |            |                       | 1 (0.9%)                 |            |                       |
| Histological grade |                        |            | <b>0.006</b>          |                          |            | <b>0.046</b>          |
| I & II             | 81 (39.7%)             | 73 (35.8%) |                       | 43 (40.6%)               | 37 (34.9%) |                       |
| III                | 15 (7.4%)              | 35 (17.2%) |                       | 8 (7.5%)                 | 18 (17.0%) |                       |
| Tumor size         |                        |            | <b>0.000</b>          |                          |            | <b>0.000</b>          |
| <2 cm              | 63 (30.9%)             | 30 (14.7%) |                       | 42 (39.6%)               | 19 (17.9%) |                       |
| ≥2 cm              | 39 (19.1%)             | 72 (35.3%) |                       | 9 (8.5%)                 | 36 (34.0%) |                       |
| Node status        |                        |            | <b>0.033</b>          |                          |            | <b>0.000</b>          |
| Negative           | 48 (23.8%)             | 69 (34.2%) |                       | 48 (45.3%)               | 33 (31.1%) |                       |
| Positive           | 48 (23.8%)             | 37 (18.3%) |                       | 3 (2.8%)                 | 22 (20.8%) |                       |
| NA                 | 1 (0.5%)               |            |                       | 0 (0.0%)                 |            |                       |
| ER status          |                        |            | 0.777                 |                          |            | <b>0.000</b>          |
| Negative           | 43 (21.4%)             | 51 (25.4%) |                       | 16 (15.2%)               | 43 (41.0%) |                       |
| Positive           | 52 (25.9%)             | 55 (27.4%) |                       | 30 (28.6%)               | 16 (15.2%) |                       |
| NA                 | 3 (1.5%)               |            |                       | 1 (0.9%)                 |            |                       |
| PR status          |                        |            | 0.550                 |                          |            | <b>0.000</b>          |
| Negative           | 59 (29.5%)             | 73 (36.5%) |                       | 20 (19.0%)               | 46 (43.8%) |                       |
| Positive           | 34 (17.0%)             | 34 (17.0%) |                       | 26 (24.8%)               | 13 (12.4%) |                       |
| NA                 | 4 (2.0%)               |            |                       | 1 (0.9%)                 |            |                       |
| HER2 status        |                        |            | 0.262                 |                          |            | 0.630                 |
| Negative           | 53 (26.2%)             | 51 (25.2%) |                       | 35 (33.3%)               | 48 (45.7%) |                       |
| Positive           | 42 (20.8%)             | 56 (27.7%) |                       | 11 (10.5%)               | 11 (10.5%) |                       |
| NA                 | 2 (1.0%)               |            |                       | 1 (0.9%)                 |            |                       |

Abbreviations: *ER*, estrogen receptor; *PR*, progesterone receptor; *HER2*, human epidermal growth factor receptor 2; *NA*, not available

Bold values are significant ( $P < 0.05$ ).

<sup>a</sup>Based on Pearson's  $\chi^2$  test

**Supplementary Table S3: Clinicopathological characteristics and the risk score of STMN1-E/P/C model in both training set and validation set**

| Characteristics    | Training set (n = 204) |            |                       | Validation set (n = 106) |            |                       |
|--------------------|------------------------|------------|-----------------------|--------------------------|------------|-----------------------|
|                    | Low risk               | High risk  | <i>P</i> <sup>a</sup> | Low risk                 | High risk  | <i>P</i> <sup>a</sup> |
| Age                |                        |            | 0.573                 |                          |            | 0.243                 |
| <50 y              | 43 (21.1%)             | 48 (23.5%) |                       | 22 (21.0%)               | 30 (28.6%) |                       |
| ≥50 y              | 59 (28.9%)             | 54 (26.5%) |                       | 29 (27.6%)               | 24 (22.9%) |                       |
| NA                 | 0 (0.0%)               |            |                       | 1 (0.9%)                 |            |                       |
| Menopausal status  |                        |            | 0.670                 |                          |            | 1.000                 |
| Premenopausal      | 40 (19.6%)             | 44 (21.6%) |                       | 22 (20.8%)               | 24 (22.6%) |                       |
| Postmenopausal     | 62 (30.4%)             | 58 (28.4%) |                       | 29 (27.4%)               | 31 (29.2%) |                       |
| Tumor Stage        |                        |            | <b>0.000</b>          |                          |            | <b>0.000</b>          |
| I                  | 48 (23.6%)             | 11 (5.4%)  |                       | 23 (21.9%)               | 9 (8.6%)   |                       |
| II                 | 46 (22.7%)             | 61 (30.0%) |                       | 25 (23.8%)               | 22 (21.0%) |                       |
| III                | 7 (3.4%)               | 30 (14.8%) |                       | 3 (2.9%)                 | 23 (21.9%) |                       |
| NA                 | 1 (0.5%)               |            |                       | 1 (0.9%)                 |            |                       |
| Histological grade |                        |            | <b>0.000</b>          |                          |            | <b>0.046</b>          |
| I & II             | 92 (45.1%)             | 62 (30.4%) |                       | 43 (40.6%)               | 37 (34.9%) |                       |
| III                | 104.9%                 | 40 (19.6%) |                       | 8 (7.5%)                 | 18 (17.0%) |                       |
| Tumor size         |                        |            | <b>0.000</b>          |                          |            | <b>0.022</b>          |
| <2 cm              | 63 (30.9%)             | 30 (14.7%) |                       | 31 (28.6%)               | 19 (18.1%) |                       |
| ≥2 cm              | 39 (19.1%)             | 72 (35.3%) |                       | 21 (20.0%)               | 35 (33.4%) |                       |
| Node status        |                        |            | <b>0.000</b>          |                          |            | <b>0.000</b>          |
| Negative           | 78 (38.4%)             | 39 (19.2%) |                       | 42 (39.6%)               | 19 (17.9%) |                       |
| Positive           | 23 (11.3%)             | 63 (31.0%) |                       | 9 (8.5%)                 | 36 (34.0%) |                       |
| NA                 | 1 (0.5%)               |            |                       | 0 (0.0%)                 |            |                       |
| ER status          |                        |            | 0.323                 |                          |            | <b>0.019</b>          |
| Negative           | 43 (21.4%)             | 51 (25.4%) |                       | 22 (21.0%)               | 37 (35.2%) |                       |
| Positive           | 57 (28.4%)             | 50 (24.9%) |                       | 28 (26.7%)               | 18 (17.1%) |                       |
| NA                 | 3 (1.5%)               |            |                       | 1 (0.9%)                 |            |                       |
| PR status          |                        |            | 0.551                 |                          |            | 0.225                 |
| Negative           | 63 (31.5%)             | 69 (34.5%) |                       | 28 (26.7%)               | 38 (36.2%) |                       |
| Positive           | 36 (18.0%)             | 32 (16.0%) |                       | 22 (21.0%)               | 17 (16.2%) |                       |
| NA                 | 4 (2.0%)               |            |                       | 1 (0.9%)                 |            |                       |
| HER2 status        |                        |            | 0.324                 |                          |            | 0.483                 |
| Negative           | 48 (23.8%)             | 56 (27.7%) |                       | 38 (36.2%)               | 45 (42.9%) |                       |
| Positive           | 53 (26.2%)             | 45 (22.3%) |                       | 12 (11.4%)               | 10 (9.5%)  |                       |
| NA                 | 2 (1.0%)               |            |                       | 1 (0.9%)                 |            |                       |

Abbreviations: *ER*, estrogen receptor; *PR*, progesterone receptor; *HER2*, human epidermal growth factor receptor 2; *NA*, not available

Bold values are significant ( $P < 0.05$ ).

<sup>a</sup>Based on Pearson's  $\chi^2$  test
